# Supplementary material for: Phylodynamic analysis of HIV-1 subtypes B, C and CRF 02_AG in Senegal
Source: PubMed Central journal article supplement (PMC10066795; doi:10.1016/j.epidem.2019.100376), 2019-11-14
Supplement: NIHMS1578445-supplement-1.pdf [file NIHMS1578445-supplement-1.pdf]

# Phylodynamic analysis of HIV-1 subtypes B, C and CRF 02\_AG in Senegal

Fabrcia F. Nascimento<sup>1</sup>, Stefan Baral<sup>2</sup>, Lily Geidelberg<sup>1</sup>, Christinah Mukandavire<sup>1</sup>,  
Sheree R. Schwartz<sup>2</sup>, Gnilane Turpin<sup>2</sup>, Nguissali Turpin<sup>3</sup>, Daouda Diouf<sup>3</sup>,  
Nafissatou Leye Diouf<sup>4</sup>, Karleen Coly<sup>2</sup>, Coumba Toure Kane<sup>4</sup>, Cheikh Ndour<sup>5</sup>, Peter  
Vickerman<sup>6</sup>, Marie-Claude Boily<sup>1</sup>, and Erik M. Volz<sup>1, 7, \*</sup>

<sup>1</sup>Department of Infectious Disease Epidemiology, Imperial College London, Norfolk  
Place W2 1PG, UK

<sup>2</sup>Department of Epidemiology, Johns Hopkins School of Public Health, Baltimore,  
MD, USA

<sup>3</sup>Enda Sante, Dakar, Senegal

<sup>4</sup>Institut de Recherche en Sante, de Surveillance Epidemiologique et de Formations,  
Dakar, Senegal

<sup>5</sup>Division de La Lutte Contre Le Sida et Les IST, Ministry of Health, Dakar, Senegal

<sup>6</sup>Population Health Sciences, Bristol Medical School, University of Bristol, Bristol,  
UK

<sup>7</sup>MRC Centre for Global Infectious Disease Analysis, Imperial College London, UK

\*Corresponding author: Erik M. Volz, e.volz@imperial.ac.uk

October 28, 2019

## 1 **Supplementary Material**

### 2 **Parameter Estimation**

3 We estimated the parameters of our mathematical model using the differential-evolution Markov  
4 chain Monte Carlo (MCMC) zs sampler (MCMC-DEzs) (ter Braak and Vrugt, 2008). We initially run  
5 few MCMC-DEzs for 3,000 to 4,000 iterations, and we chose one run per analyses to provide initial  
6 conditions for subsequent longer runs. Because of computational resources, we run several longer  
7 MCMC-DEzs ranging from 10,000 to 15,000 iterations using different initial conditions depending  
8 on the analyses. These longer MCMC-DEzs were run in parallel using the computing resources of  
9 the Open Science Grid (OSG) (Pordes *et al.*, 2007; Sfiligoi *et al.*, 2009). We merged from 4 to 15  
10 independent runs (also depending on the analyses) in order to have two sets of runs to compare  
11 posterior distributions for each parameter and assess convergence of the chains. We also used the  
12 Gelman diagnostics to check for convergence.

13 The calculation of the likelihood used in the MCMC-DEzs was carried out using the function *colik*  
14 in R package *phydynR* version 0.1 (Volz, 2017). This function implements the structured coalescent  
15 model (SCM) (Volz, 2012) which model each HIV-1 lineage in the phylogeny assuming that each  
16 node in the phylogenetic tree corresponds to a single transmission event. For the calculation of

17 the likelihood we provided a demographic model using the *build.demographic.process* function in  
 18 *phydynR*, and we set the initial and end time of the calculations to 1978 and 2014, respectively.  
 19 For a list of parameters we estimated and their corresponding prior see Table S1.

Table S1: Summary of parameters estimated and MCMC priors

| Parameter                                                              | Prior           |
|------------------------------------------------------------------------|-----------------|
| Transmission rate parameter of linear function gp0                     | Gamma(3, 3/0.1) |
| Transmission rate parameter of linear function gp1                     | Gamma(3, 3/0.1) |
| Transmission rate parameter of linear function gp2                     | Gamma(3, 3/0.1) |
| Linear function interval (time) for gp                                 | U(1978, 2014)   |
| Transmission rate parameter of linear function msm0                    | Gamma(3, 3/0.1) |
| Transmission rate parameter of linear function msm1                    | Gamma(3, 3/0.1) |
| Transmission rate parameter of linear function msm2                    | Gamma(3, 3/0.1) |
| Linear function interval (time) for msm                                | U(1978, 2014)   |
| Risk ratio of <i>gpm</i> to transmit to <i>gpf</i> ( $\psi$ )          | U(0.5, 2)       |
| Importation rate                                                       | Exp(30)         |
| Effective population size of <i>src</i>                                | Exp(1/100)      |
| Probability of infected <i>gpf</i> to transmit to a <i>gpm</i> ( $p$ ) | Beta(16, 4)     |
| Probability of infected <i>msm</i> to transmit to a <i>msm</i> ( $q$ ) | Beta(16, 4)     |
| Initial number of infected <i>msm</i>                                  | Exp(1/3)        |
| Initial number of infected <i>gp</i>                                   | Exp(1/3)        |
| Removal rate ( $\gamma$ )                                              | Fixed at 1/10   |

## 20 Prevalence and Likelihood Calculation

21 We computed a statistic to calculate the proportion of infected heterosexual reproductive aged men  
 22 (*gpm*) that are *msm* that we could compare to our mathematical model. For that we used available  
 23 HIV-1 prevalence data for *gpm* in 2010 (4.0%, 95% CI: 14% – 80%) and for *msm* in 2016 (29.7%,  
 24 95% CI: 21.3% – 38.1%) in Dakar, Senegal (Mukandavire *et al.*, 2018). We also used surveillance  
 25 data on the proportion of men who are *msm* (1.2%) (Mukandavire *et al.*, 2018), and we assumed  
 26 that this proportion was independent of the estimated HIV prevalence for *gpm* and *msm*. Using this  
 27 information, we have:

$$X = q \times p_{msm} / (q \times p_{msm} + (1 - q) \times p_m) \quad (1)$$

28 Where  $q$  is the proportion of males who are *msm*;  $p_{msm}$  is HIV prevalence in *msm*; and  $p_m$  is  
 29 HIV prevalence in *gpm*. We also extrapolated and assumed that *msm* HIV prevalence in 2010 was  
 30 the same as in 2016.

31 We then approximate the standard deviation of  $X$  to a normal distribution, and recomputed  
 32  $X$  for many replicates of  $q$ ,  $p_m$  and  $p_{msm}$  using the differential-evolution Markov chain Monte  
 33 Carlo zs sampler. We also calculated the “observed”  $X$  ( $X_{OBS}$ ) for 2010 in our phylodynamic  
 34 analysis, and the mean and standard deviation of  $X$ . Using this information we added the term  
 35  $dnorm(X_{obs}, X_{mean}, X_{sd}, log = TRUE)$  to the calculation of the likelihood. See scripts available  
 36 at <https://github.com/thednainus/senegalHIVmodel> for further information on how we imple-  
 37 mented these calculations in R.

## 38 Statistical Analyses

39 After estimating the parameters of our mathematical model (Table S1), we calculated statistics of  
40 interest in molecular epidemiology. We calculated these statistics using the MCMC-DEzs posterior  
41 distribution, after removing the burnin, and for maximum a posteriori (MAP) estimates. Note  
42 that in SCM as implemented in *phydynR*, we provided the ordinary differential equations (ODEs) as  
43 matrices for birth and migration rates, and a vector for the removal rate (Volz, 2012). The birth  
44 matrix represents the number of HIV transmissions within the different sub-populations or demes  
45 (*gpf*, *gpm*, *msm* and *src*). Similarly, the migration matrix represents allowed transmissions from one  
46 sub-population/deme to another sub-population/deme, for example, transmissions from *gpm* to *gpf*.

47 For each parameter estimates in the posterior distribution, and for the MAP, we solved a de-  
48 mographic model using *phydynR* and estimated the birth and migration matrices, and the effective  
49 number of infections for each time point from 1978 to 2014.

50 In summary, the statistics we calculated for the dynamics of HIV in Senegal were:

- 51 • The population attributable fraction (PAF) for each group: *gpf*, *gpm* and *msm*, which are  
52 represented by each row in the birth matrix;
- 53 • The recent proportion of infections in one group attributable to another group. For example:  
54 proportion of infections in *gpf* attributable to *msm*;
- 55 • The effective number of infections for each group: *gpm*, *gpf* and *msm*.

## 56 Results

57 Below are the plots for the effective number of infections and population attributable fraction (PAF)  
58 for each variation of the model not depicted in the main text.

59 For the individual analyses for subtype CRF 02\_AG and subtype C, the following applies:

- 60 • Model 1: We assigned each sequence to its respective risk-group in the phylogenetic tree a  
61 value of 1.0 (100% in the respective self-reported risk group);
- 62 • Model 2: We assumed some uncertainty in the self-reported *gpm* by assigning to every *gpm*  
63 sequence a value of 0.5 (50%) of being *gpm* and 0.5 (50%) of being *msm*;
- 64 • Model 3: We assigned each sequence to its respective risk-group in the phylogenetic tree a  
65 value of 1.0 (100% in the respective self-reported risk group) and added the prevalence term  
66 to the calculation of the likelihood. This plot is only shown in the main text only;
- 67 • Model 4: We assumed some uncertainty in the self-reported *gpm* by assigning to every *gpm*  
68 sequence a value of 0.5 (50%) of being *gpm* and 0.5 (50%) of being *msm*. We also added the  
69 prevalence term to the calculation of the likelihood.

70 For the combined analyses using data from subtypes B, C and CRF 02\_AG the following applies:

- 71 • Model 1: We assigned each sequence to its respective risk-group in the phylogenetic tree a  
72 value of 1.0 (100% in the respective self-reported risk group);
- 73 • Model 2: We removed all *gpm* sequences from the phylogenetic tree;
- 74 • Model 3: We assumed some uncertainty in the self-reported *gpm* by assigning to every *gpm*  
75 sequence a value of 0.5 (50%) of being *gpm* and 0.5 (50%) of being *msm*;

- 76 • Model 4: We assigned each sequence to its respective risk-group in the phylogenetic tree a  
77 value of 1.0 (100% in the respective self-reported risk group) and added the prevalence term  
78 to the calculation of the likelihood. This plot is only shown in the main text only;
- 79 • Model 5: We removed all *gpm* sequences from the phylogenetic tree and added the prevalence  
80 term to the calculation of the likelihood;
- 81 • Model 6: We assumed some uncertainty in the self-reported *gpm* by assigning to every *gpm*  
82 sequence a value of 0.5 (50%) of being *gpm* and 0.5 (50%) of being *msm* and added the  
83 prevalence term to the calculation of the likelihood.

## 84 Subtype C: Model 2

85 For subtype C model 2 we noticed that the MCMC runs for three parameters representing the linear  
86 function for *msm* did not converge to the same posterior distribution. This could be attributable  
87 to non-identifiability of these parameters. For MCMC posterior probability plots, see [analyses/  
88 results/plots/mcmc\\_runs](#) within the GitHub repository for the Senegal analyses. [https://github.  
89 com/thednainus/senegalHIVmodel](https://github.com/thednainus/senegalHIVmodel).

90 To better understand if this was a potential non-identifiability problem, we solved PAF and effec-  
91 tive number of infections using both results from the MCMC posterior distributions. Results were  
92 very similar as observed at [results/plots/plots\\_withMaleX/subtypeC\\_model2](#) in the GitHub  
93 repository <https://github.com/thednainus/senegalHIVmodel>.

## 94 Effective Number of Infections

Figure S1: **Effective number of infections for subtype CRF 02\_AG.** Plots showing the proportion of the effective number of infections for *gpf*, *gpm* and *msm*. MAP = maximum a posteriori.

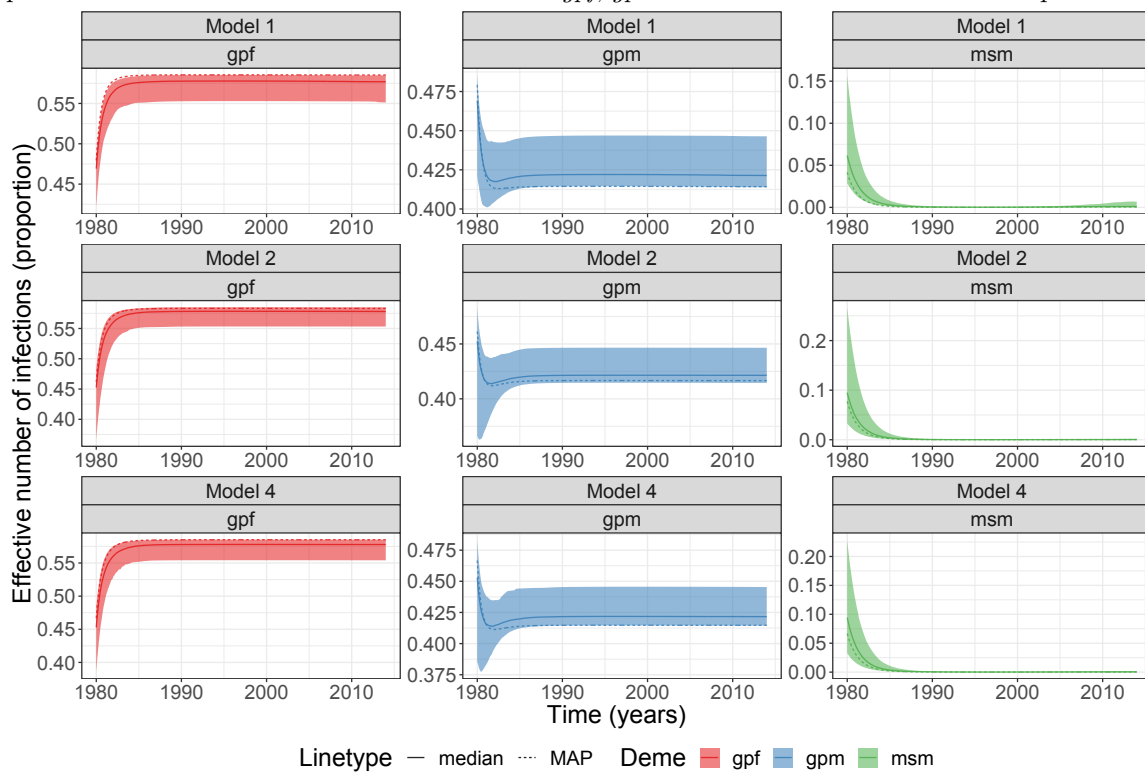

Figure S2: **Effective number of infections for subtype C.** Plots showing the proportion of the effective number of infections for *gpf*, *gpm* and *msm*. MAP = maximum a posteriori.

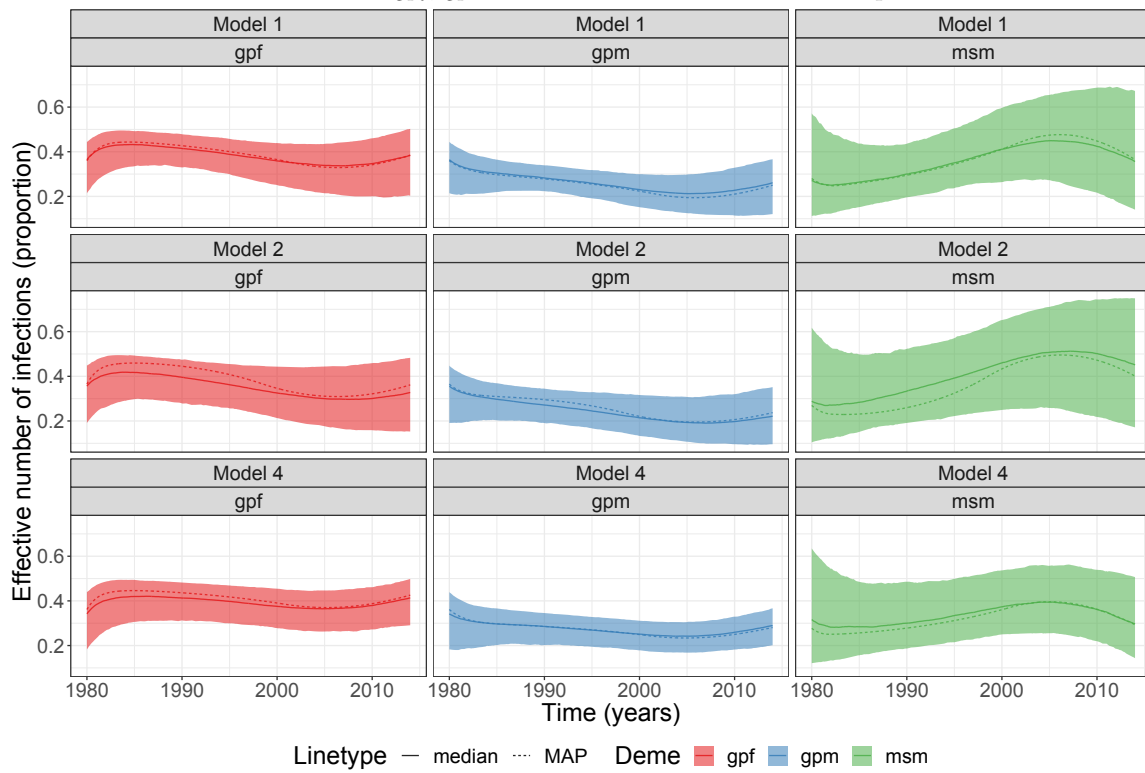

Figure S3: **Effective number of infections for combined analyses.** Plots showing the proportion of the effective number of infections for *gpf*, *gpm* and *msm*. MAP = maximum a posteriori.

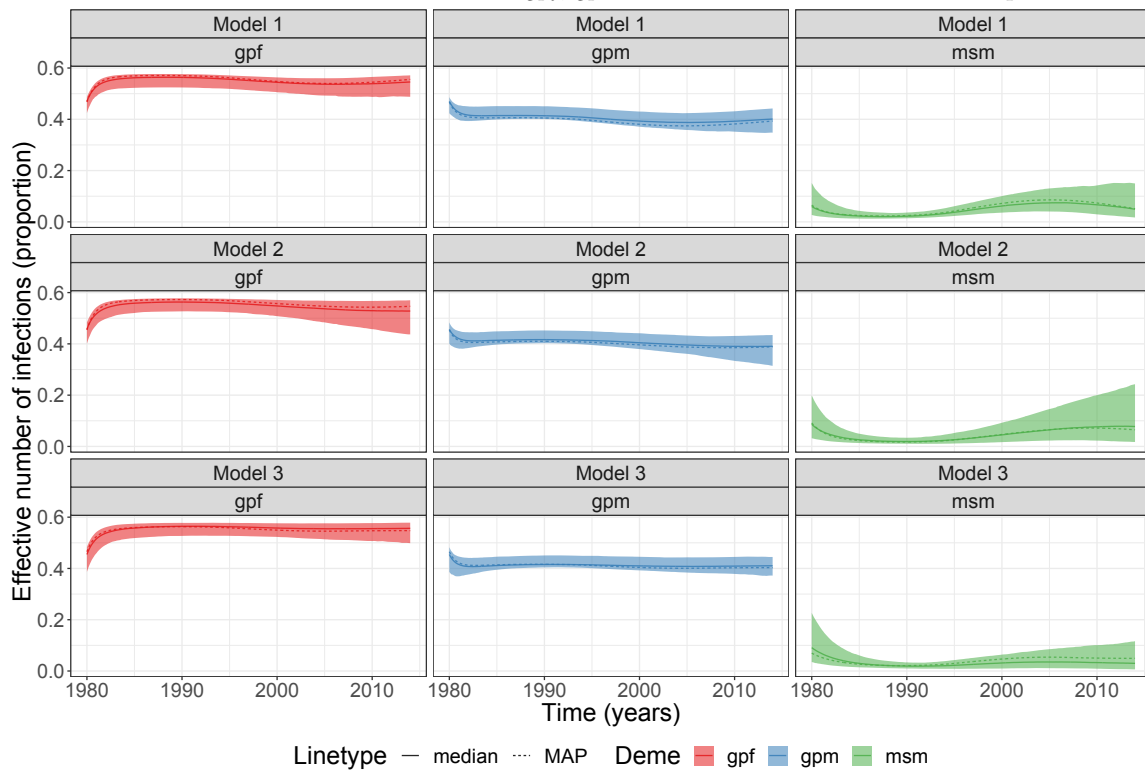

Figure S4: **Effective number of infections for combined analyses.** Plots showing the proportion of the effective number of infections for *gpf*, *gpm* and *msm*. MAP = maximum a posteriori.

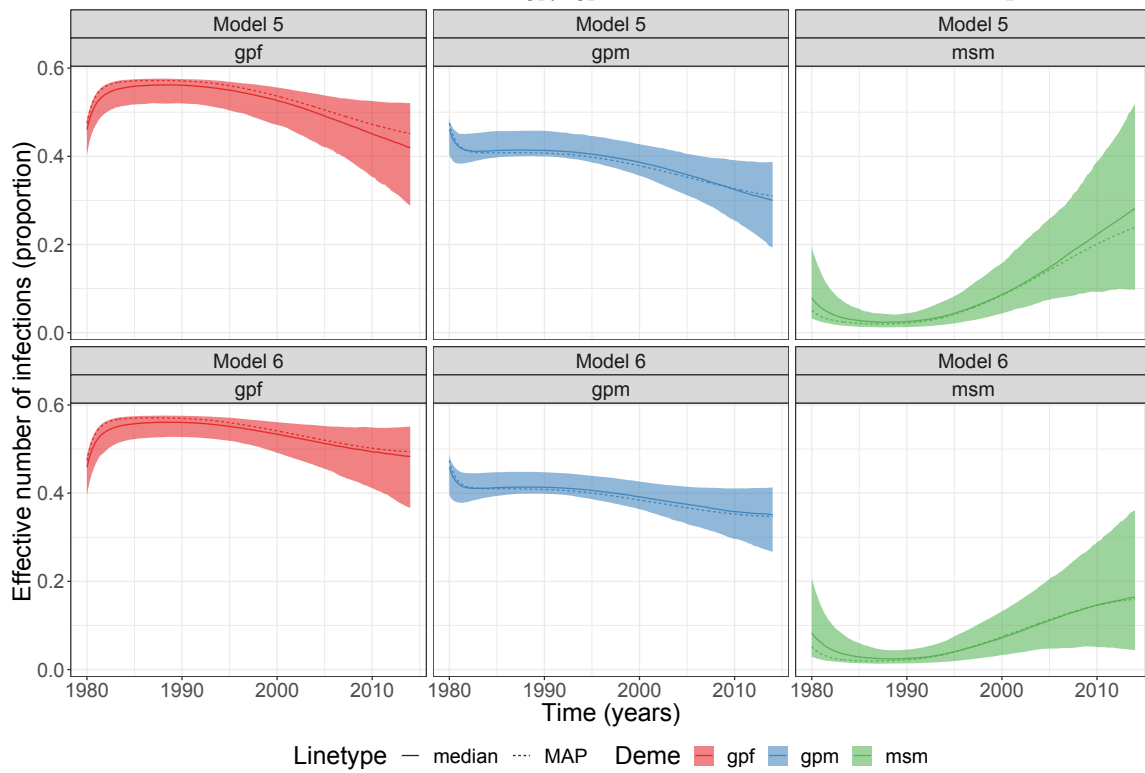



95 **Population attributable fraction**

Figure S5: **Population attributable fraction for subtype CRF 02\_AG.** Plots showing the population attributable fraction for *gpf*, *gpm* and *msm*. Point estimates and error bars in the last plot represents 1-year PAF estimated for MSM in Mukandavire *et al.* (2018). MAP = maximum a posteriori.

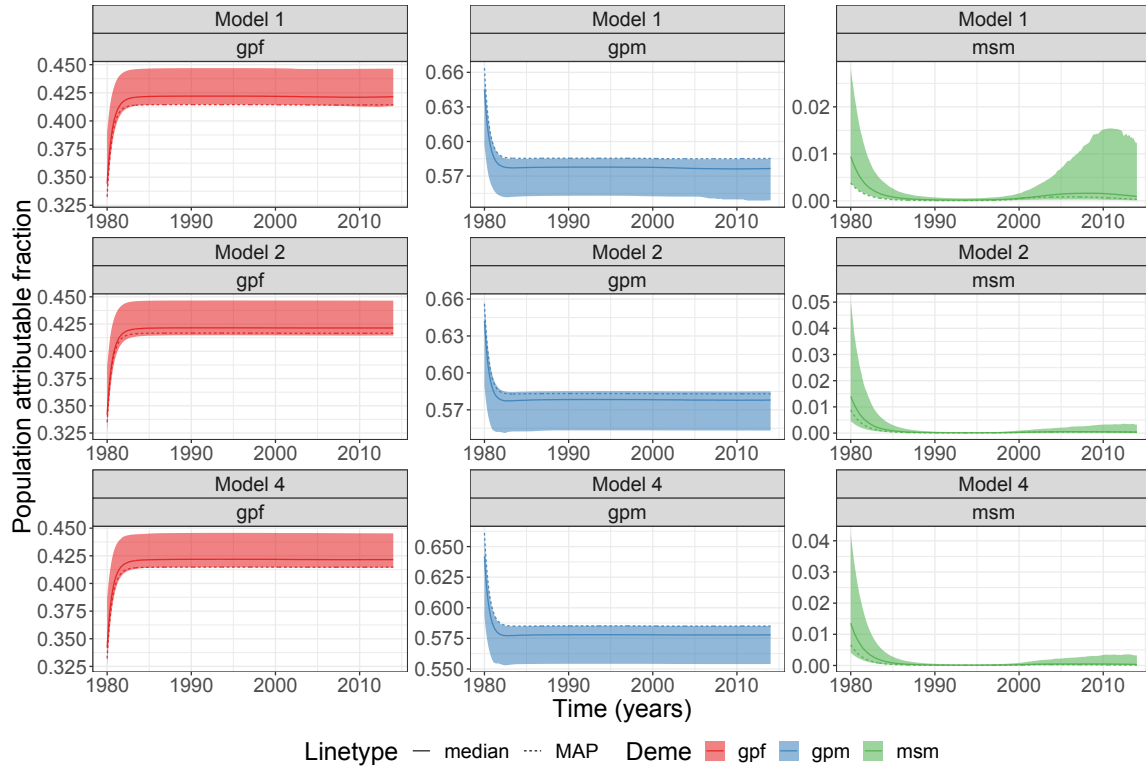

Figure S6: **Population attributable fraction for subtype C.** Plots showing the population attributable fraction for *gpf*, *gpm* and *msm*. Point estimates and error bars in the last plot represents 1-year PAF estimated for MSM in Mukandavire *et al.* (2018). MAP = maximum a posteriori.

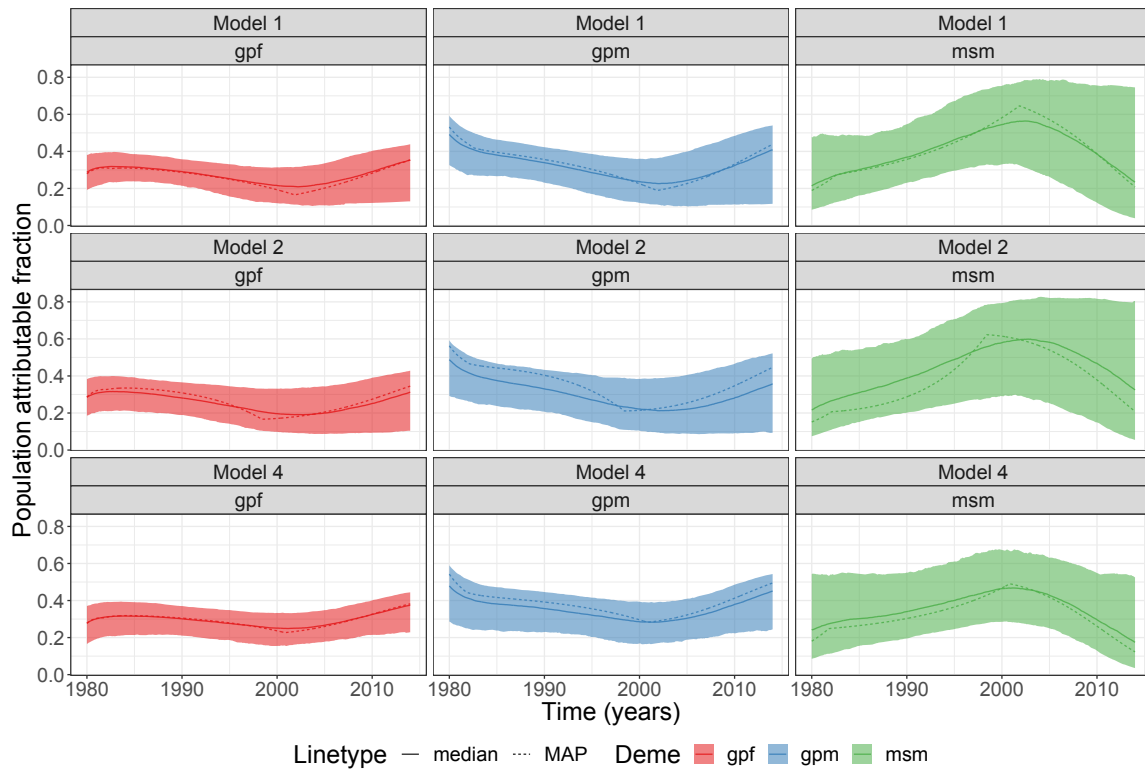

Figure S7: **Population attributable fraction for the combined analyses.** Plots showing the population attributable fraction for *gpf*, *gpm* and *msm*. Point estimates and error bars in the last plot represents 1-year PAF estimated for MSM in Mukandavire *et al.* (2018). MAP = maximum a posteriori.

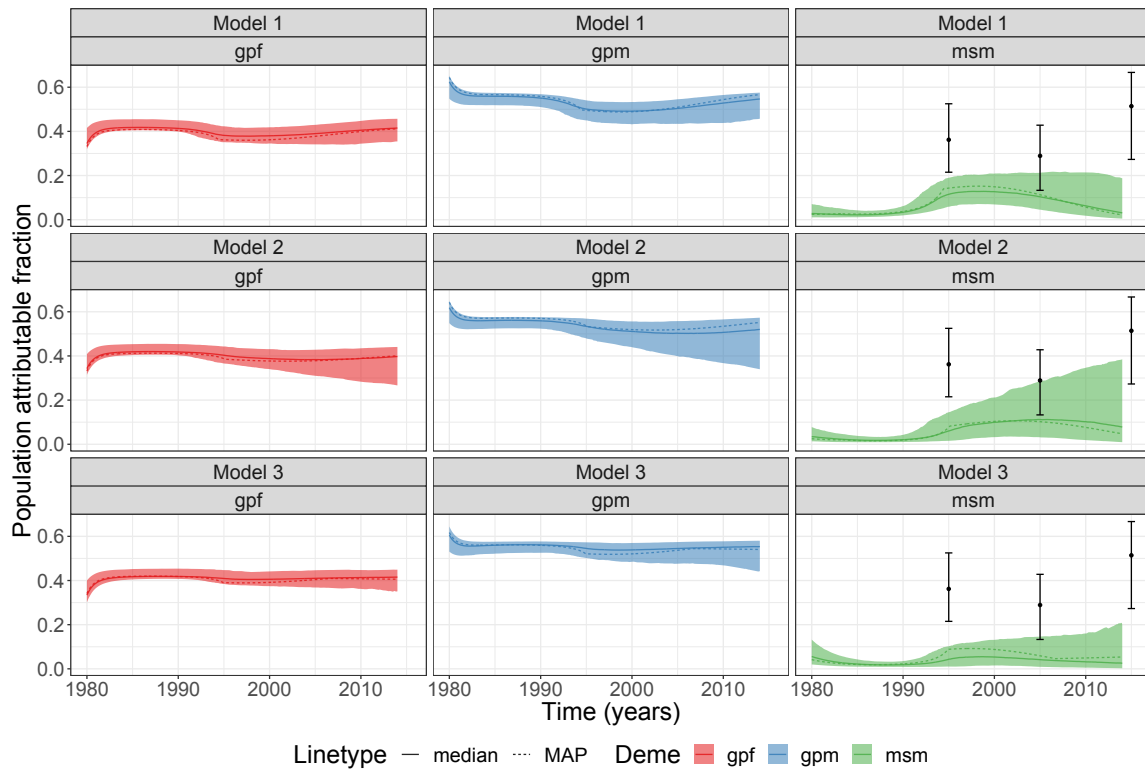

Figure S8: **Population attributable fraction for the combined analyses.** Plots showing the population attributable fraction for *gpf*, *gpm* and *msm*. Point estimates and error bars in the last plot represents 1-year PAF estimated for MSM in Mukandavire *et al.* (2018). MAP = maximum a posteriori.

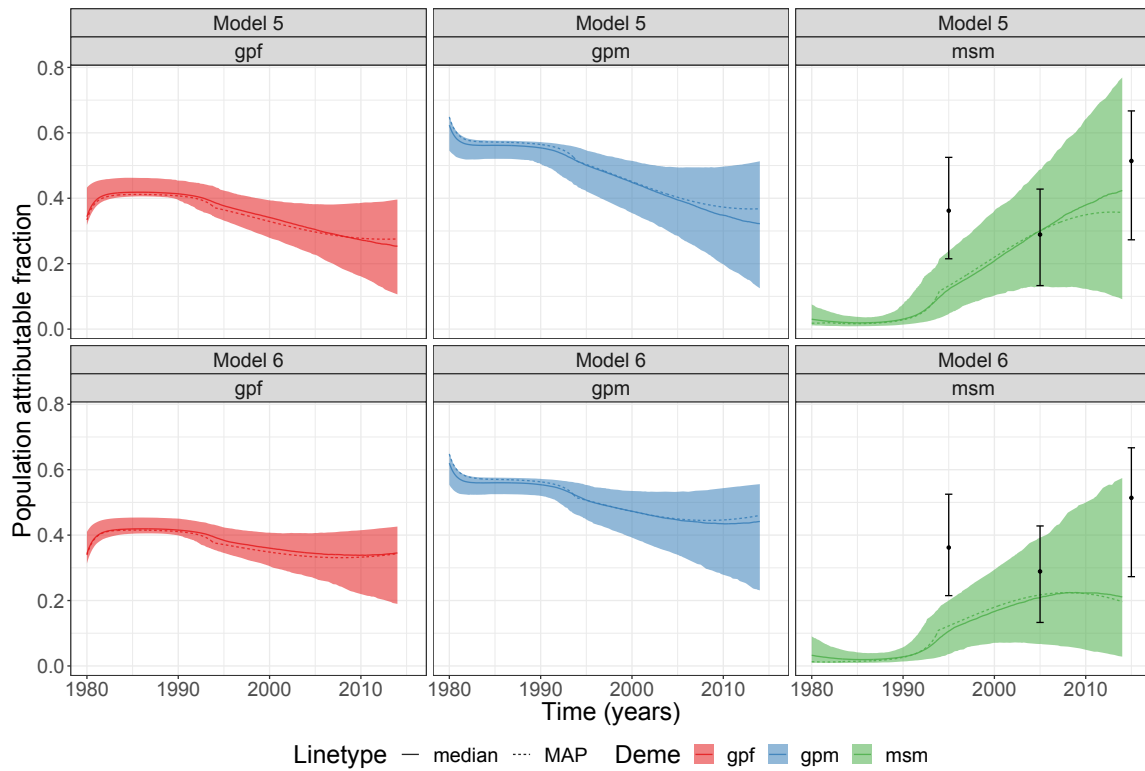

## References

- 96  
97 Mukandavire, C., Walker, J., Schwartz, S., Boily, M., Danon, L., Lyons, C., Diouf, D., Liestman,  
98 B., Diouf, N. L., Drame, F., Coly, K., Muhire, R. S. M., Thiam, S., Diallo, P. A. N., Kane, C. T.,  
99 Ndour, C., Volz, E., Mishra, S., Baral, S., and Vickerman, P. (2018). Estimating the contribution  
100 of key populations towards the spread of HIV in Dakar, Senegal. *Journal of the International*  
101 *AIDS Society*, **21**(Suppl Suppl 5).
- 102 Pordes, R., Petravick, D., Kramer, B., Olson, D., Livny, M., Roy, A., Avery, P., Blackburn, K.,  
103 Wenaus, T., Würthwein, F., Foster, I., Gardner, R., Wilde, M., Blatecky, A., McGee, J., and  
104 Quick, R. (2007). The open science grid. In *Journal of Physics: Conference Series*, volume 78.
- 105 Sfiligoi, I., Bradley, D. C., Holzman, B., Mhashilkar, P., Padhi, S., and Würthwein, F. (2009).  
106 The pilot way to Grid resources using glideinWMS. In *2009 WRI World Congress on Computer*  
107 *Science and Information Engineering, CSIE 2009*, volume 2, pages 428–432.
- 108 ter Braak, C. J. F. and Vrugt, J. A. (2008). Differential Evolution Markov Chain with snooker  
109 updater and fewer chains. *Statistics and Computing*, **18**(4), 435–446.
- 110 Volz, E. (2017). phydynR: Phylogenetic dating and phylodynamic inference by sequential Monte  
111 Carlo. <https://github.com/emvolz-phylogenetics/phydynR>, visited 2019-01-22.
- 112 Volz, E. M. (2012). Complex population dynamics and the coalescent under neutrality. *Genetics*,  
113 **190**(1), 187–201.
